# Supplementary material for: Regulating the Assembly of Precursors of Carbon Nitrides to Improve Photocatalytic Hydrogen Production
Source: MDPI journal article supplement (doi:10.3390/catal12121634), 2022-12-13
Supplement: s1 [file s1]

Archive with 1 entries (1 files):
- catalysts-2054404-supplementary.pdf
