# Supplementary material for: Regulating the Assembly of Precursors of Carbon Nitrides to Improve Photocatalytic Hydrogen Production
Source: MDPI journal article supplement (doi:10.3390/catal12121634), 2022-12-13
Supplement: s1 [file s1 › catalysts-2054404-supplementary.pdf]

# Regulating the Assembly of Precursors of Carbon Nitrides to Improve Photocatalytic Hydrogen Production

Xinying Liu, Chengxiao Zhao Tahir Muhmood\* and Xiaofei Yang\*

College of Science, Nanjing Forestry University, Nanjing 210037, China.

\* Correspondence: muhmoodtahir@njfu.edu.cn (T.M.); xiaofei.yang@njfu.edu.cn (X.Y.)

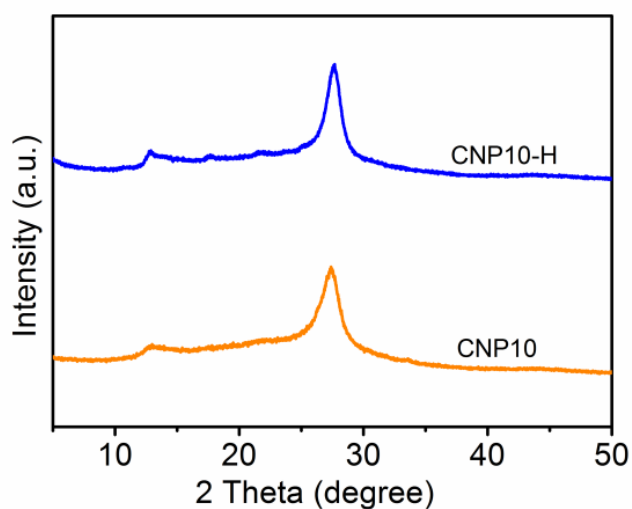

Figure S1 XRD patterns of CNP10 and CNP10-H.

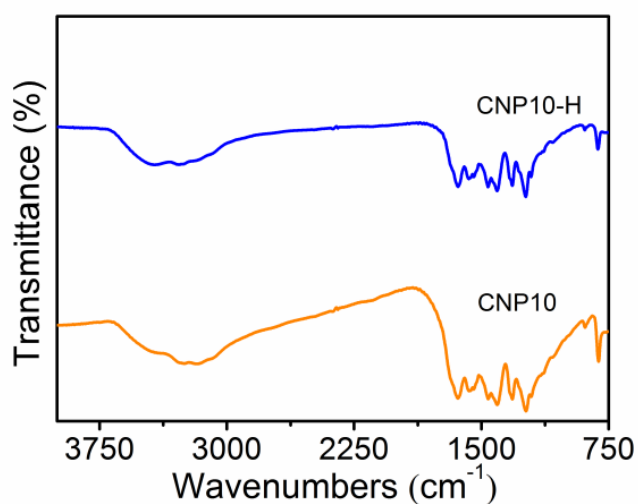

Figure S2 FTIR spectra of CNP10 and CNP10-H.

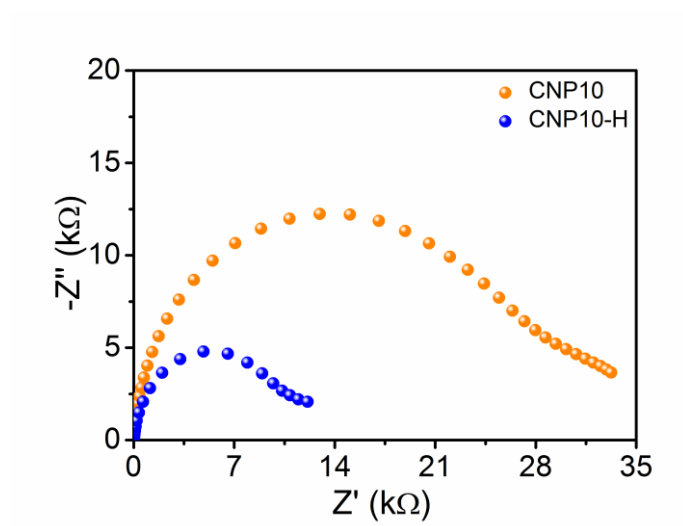

Figure S3 Nyquist plots EIS spectroscopy from CNP10 and CNP10-H.

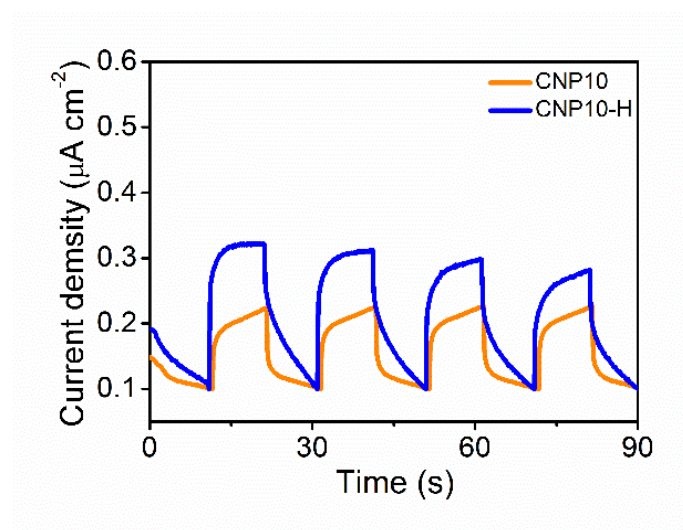

Figure S4 Photocurrent response of CNP10 and CNP10-H.
